# Supplementary material for: A capped trigonal prismatic cobalt(ii) complex as a structural archetype for single-ion magnets
Source: Royal Society of Chemistry journal article supplement (doi:10.1039/c9dt04881b), 2020-01-01
Supplement: c9dt04881b1.pdf [file c9dt04881b1.pdf]

## **A Capped Trigonal Prismatic Cobalt(II) Complex as a Structure Archetype for Single-Ion Magnets**

Gangji Yi,<sup>a</sup> Huihui Cui,<sup>b</sup> Chunyang Zhang,<sup>a</sup> Wen Zhao,<sup>a</sup> Lei Chen,<sup>a,\*</sup> Yi-Quan  
Zhang,<sup>c,\*</sup> Xue-Tai Chen,<sup>b,\*</sup> You Song,<sup>b</sup> and Aihua Yuan<sup>a,\*</sup>

*<sup>a</sup>State of Environmental and Chemical Engineering, Jiangsu University of Science  
and Technology, Zhenjiang 212003, P. R. China;*

*<sup>b</sup>State Key Laboratory of Coordination Chemistry, School of Chemistry and Chemical  
Engineering, Nanjing University, Nanjing 210093, P. R. China;*

*<sup>c</sup>Jiangsu Key Lab for NSLSCS, School of Physical Science and Technology, Nanjing  
Normal University, Nanjing 210023, P. R. China.*

## **Supporting Information**

## Experimental Section

### Materials and General Characterizations

All manipulations were carried out using standard Schlenk techniques under a nitrogen atmosphere. All chemicals were purchased from commercial sources and used without further purification. The ligand [2,6-bis[bis(2-pyridylmethyl)amino]methyl]pyridine (BPA-TPA) was prepared as described previously.<sup>S1</sup> Elemental analyses were performed on an Elementar Vario ELIII elemental analyzer. The powder XRD patterns were recorded at room temperature on a Bruker D8 Advance X-ray diffractometer.

#### Synthesis of [Co<sup>II</sup>(BPA-TPA)(BF<sub>4</sub>)<sub>2</sub>] (1-Co)

To the solution of CoCl<sub>2</sub> (1.0 mmol, 0.130 g) in methanol (5 mL) was added the solution of AgBF<sub>4</sub> (2.0 mmol, 0.390 g) in methanol (10 mL). The insoluble silver chloride was immediately generated and then removed by filtration. The BPA-TPA ligand was added to the filtrate, and diethyl ether (20 mL) was allowed to slowly diffuse into the solution. After 2-4 days red crystals were obtained in 56 % yield. Anal. Calc. for C<sub>31</sub>H<sub>31</sub>B<sub>2</sub>CoF<sub>8</sub>N<sub>7</sub>: C, 50.72; H, 4.26; N, 13.36. Found: C, 50.65; H, 4.20; N, 13.42.

#### Synthesis of [Fe<sup>II</sup>(BPA-TPA)(ClO<sub>4</sub>)<sub>2</sub>] (2-Fe)

Preparation of **2-Fe** was performed according to the method of Hazell *et al.*<sup>S2</sup> Fe(ClO<sub>4</sub>)<sub>2</sub>·6H<sub>2</sub>O was added to the solution of BPA-TPA ligand (0.5 mmol, 0.25 g) in methanol (10 mL), and the solution was stirred under dinitrogen for 10 min. The solution was allowed to stand in a closed vessel and pink crystals of formed overnight. The yield is 68 %. Anal. Calc. for C<sub>31</sub>H<sub>31</sub>Cl<sub>2</sub>FeN<sub>7</sub>O<sub>8</sub>: C, 49.23; H, 4.13; N, 12.96. Found: C, 49.29; H, 4.06; N, 13.04.

### X-ray Structure Determination

Single crystal X-ray diffraction data for both complexes were collected using a Bruker APEX DUO diffractometer with a CCD area detector (Mo K $\alpha$  radiation,  $\lambda$  = 0.71073 Å) at 296 K.<sup>S3</sup> The APEXII program was used for collecting frames of data, determining lattice parameters. Data were integrated through the SAINT. Absorption

corrections were applied using SADABS.<sup>S4</sup> The structures were solved using SHELXS-97 and subsequently completed by Fourier recycling using SHELXL 97 program.<sup>S5</sup>

### **Magnetic Measurements**

Magnetic measurements of both complexes were performed with a Quantum Design SQUID VSM magnetometer. Direct current susceptibility data were collected between 1.8 and 300 K using an applied field of 2.0 kOe. Magnetization data were recorded from 0 to 7 T at 1.8, 3, and 5 K. The temperature and frequency dependent alternating-current susceptibility measurements under different applied static magnetic fields were carried out using an oscillating ac field of 2.0 Oe and ac frequencies ranging from 1 to 1000 Hz. The magnetic susceptibilities data were corrected for the sample holder as well as for diamagnetism of the constituent atoms (estimated using Pascal's constants).

### **Computational details**

Complete-active-space self-consistent field (CASSCF) calculations on complexes **1-Co** and **2-Fe** on the basis of single-crystal X-ray determined geometries have been carried out with MOLCAS 8.4<sup>S6</sup> program package. The basis sets for all atoms are atomic natural orbitals from the MOLCAS ANO-RCC library: ANO-RCC-VTZP for Co<sup>II</sup> or Fe<sup>II</sup> ion; VTZ for close N; VDZ for distant atoms. The calculations employed the second order Douglas-Kroll-Hess Hamiltonian, where scalar relativistic contractions were taken into account in the basis set. And the spin-orbit couplings were handled separately in the restricted active space state interaction (RASSI-SO) procedure. For **1-Co**, the active electrons in 10 active spaces considering the 3d-double shell effect (5+5') include all seven 3d electrons (CAS(7 in 5+5') for Co<sup>II</sup>), and the mixed spin-free states are 50 (all from 10 quadruplets and all from 40 doublets for Co<sup>II</sup>). And for **2-Fe**, active electrons in 5 active spaces include all d electrons (CAS (6 in 5) for Fe<sup>II</sup>). We have mixed the maximum number of spin-free state which was possible with our hardware (all from 5 quintuplets, all from 45 triplets and all from 50 singlets for Fe<sup>II</sup>). In the CASSCF calculation SINGLE\_ANISO<sup>S7</sup> program was used to obtain the spin-free-orbit energy levels,

zero-field splitting (ZFS) parameters  $D(E)$  ( $\text{cm}^{-1}$ ),  $\mathbf{g}$  tensors, magnetic axes, *et al.*, based on the above CASSCF/RASSI-SO calculations.

**Table S1** Summary of crystal data and refinement for **1-Co** and **2-Fe**.

|                                       | <b>1-Co</b>                                                  | <b>2-Fe</b>                                                   |
|---------------------------------------|--------------------------------------------------------------|---------------------------------------------------------------|
| Molecular formula                     | $\text{C}_{31}\text{H}_{31}\text{B}_2\text{CoF}_8\text{N}_7$ | $\text{C}_{31}\text{H}_{31}\text{Cl}_2\text{FeN}_7\text{O}_8$ |
| CCDC no                               | 1968362                                                      | 1968363                                                       |
| Formula weight                        | 734.18                                                       | 756.38                                                        |
| Temperature / K                       | 296(2)                                                       | 296(2)                                                        |
| crystal system                        | Triclinic                                                    | Triclinic                                                     |
| Space group                           | $P-1$                                                        | $P-1$                                                         |
| $a$ / Å                               | 11.2070(3)                                                   | 11.5246(8)                                                    |
| $b$ / Å                               | 12.5604(4)                                                   | 12.2303(9)                                                    |
| $c$ / Å                               | 13.5908(4)                                                   | 14.0274(11)                                                   |
| $\beta$ / deg                         | 67.784(2)                                                    | 97.401(4)                                                     |
| $V$ / Å <sup>3</sup>                  | 1628.81(9)                                                   | 1632.4(2)                                                     |
| $Z$                                   | 2                                                            | 2                                                             |
| $D_{\text{calc}}$ , g/cm <sup>3</sup> | 1.497                                                        | 1.539                                                         |
| $\mu$ / mm <sup>-1</sup>              | 0.608                                                        | 0.688                                                         |
| $F(000)$                              | 750                                                          | 780                                                           |
| Goodness-of-fit on $F^2$              | 1.018                                                        | 1.059                                                         |
| Final R indices [ $I > 2\sigma(I)$ ]  | $R_1 = 0.0428$ ,<br>$wR_2 = 0.1012$                          | $R_1 = 0.0553$ ,<br>$wR_2 = 0.1601$                           |
| R indices (all data)                  | $R_1 = 0.0630$ ,<br>$wR_2 = 0.1144$                          | $R_1 = 0.0852$ ,<br>$wR_2 = 0.1985$                           |

$$^a wR_2 = [\Sigma[w(F_o^2 - F_c^2)^2] / \Sigma[w(F_o^2)^2]]^{1/2}, R_1 = \Sigma||F_o| - |F_c|| / \Sigma|F_o|.$$

**Table S2** Selected bond lengths (Å) and angles (°) for **1-Co** and **2-Fe**.

| <b>1-Co</b>     |            | <b>2-Fe</b>     |           |
|-----------------|------------|-----------------|-----------|
| Co(1)-N(1)      | 2.2861(19) | Fe(1)-N(1)      | 2.329(3)  |
| Co(1)-N(3)      | 2.1123(19) | Fe(1)-N(2)      | 2.209(3)  |
| Co(1)-N(4)      | 2.2391(19) | Fe(1)-N(4)      | 2.272(3)  |
| Co(1)-N(5)      | 2.3327(19) | Fe(1)-N(5)      | 2.271(3)  |
| Co(1)-N(6)      | 2.1766(19) | Fe(1)-N(6)      | 2.359(3)  |
| Co(1)-N(7)      | 2.2910(19) | Fe(1)-N(7)      | 2.255(3)  |
| Co(1)-N(2)      | 2.550(2)   | Fe(1)-N(3)      | 2.554(3)  |
|                 |            |                 |           |
| N(2)-Co(1)-N(3) | 74.02(7)   | N(2)-Fe(1)-N(3) | 73.93(11) |
| N(4)-Co(1)-N(5) | 80.76(7)   | N(4)-Fe(1)-N(5) | 85.39(11) |
| N(6)-Co(1)-N(7) | 73.34(7)   | N(6)-Fe(1)-N(7) | 72.39(11) |

**Table S3** The continuous shape measure (CSM) analyses of seven-coordinate geometries for **1-Co** and **2-Fe** by SHAPE software<sup>S8</sup>

| CSM                   | <b>1-Co</b> | <b>2-Fe</b> |
|-----------------------|-------------|-------------|
| Heptagon              | 33.749      | 33.315      |
| Hexagonal pyramid     | 16.010      | 16.942      |
| Pentagonal bipyramid  | 4.952       | 4.158       |
| Capped octahedron     | 3.275       | 4.002       |
| Capped trigonal prism | 2.715       | 2.994       |

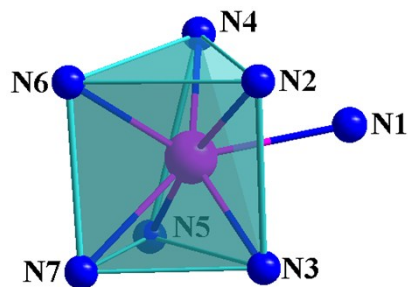**Figure S1** The coordination model of the central Co(II) ion for **1-Co**.

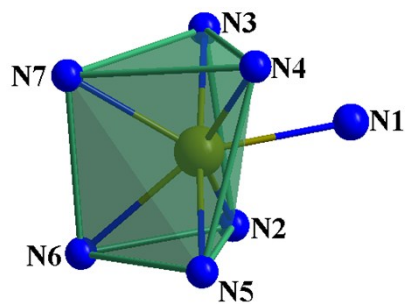

**Figure S2** The coordination model of the central Fe(II) ion for **2-Fe**.

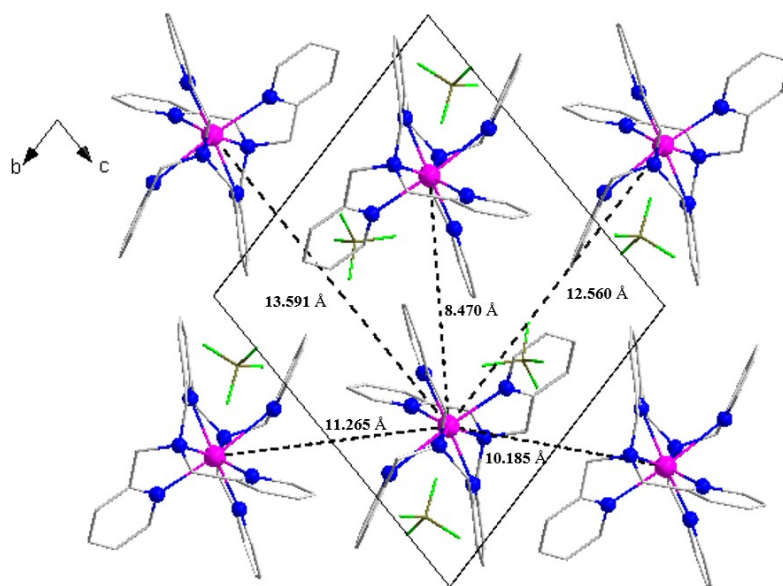

**Figure S3.** Crystal packing of **1-Co** along the *a* axis. The H atoms are omitted for clarity.

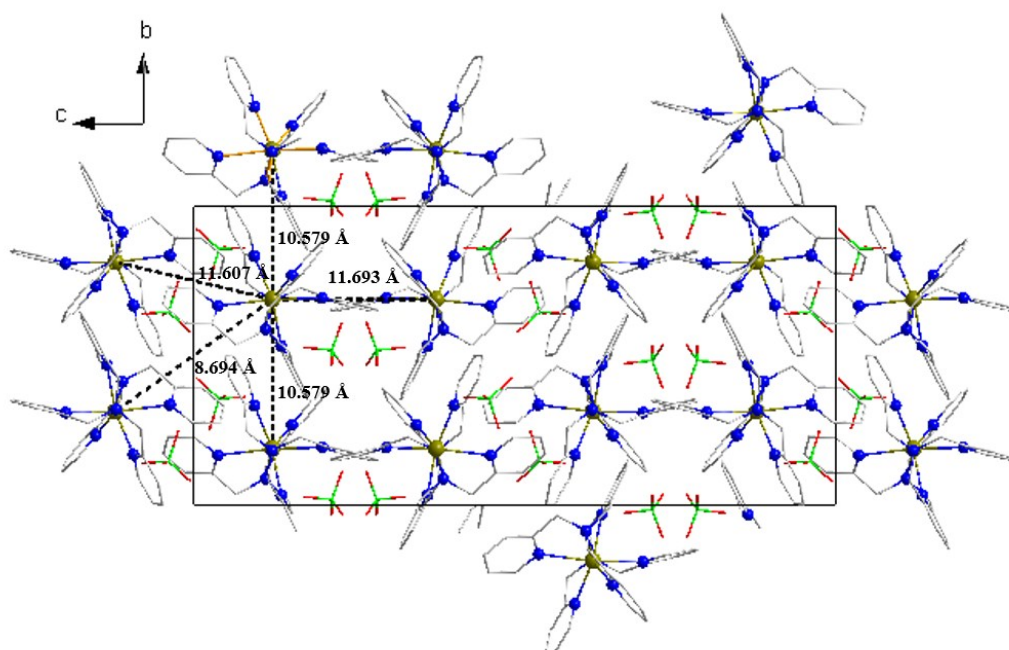

**Figure S4.** Crystal packing of **2-Fe** along the *a* axis. The H atoms are omitted for clarity.

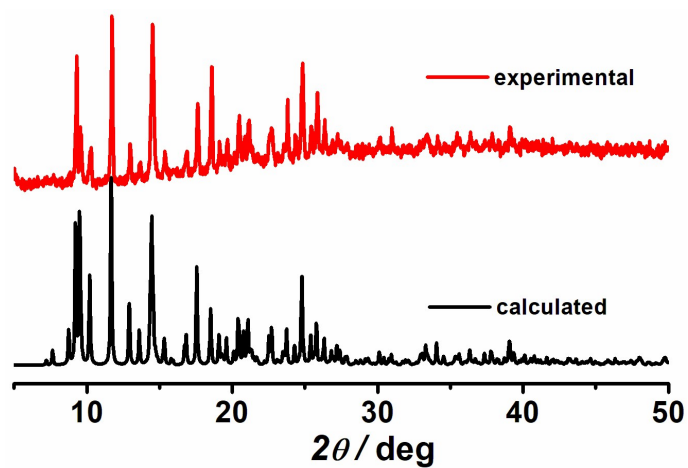

**Figure S5** The power X-ray diffraction patterns of **1-Co** at room temperature.

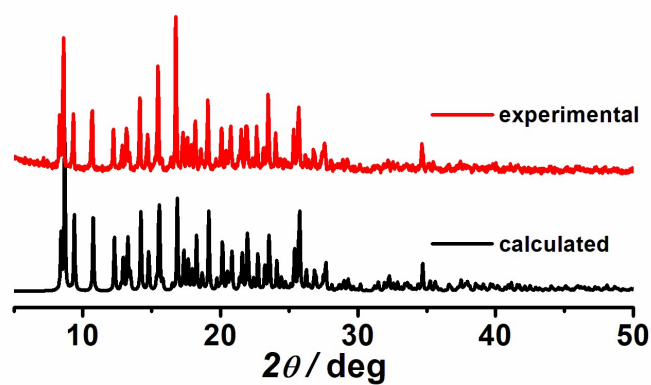

**Figure S6** The power X-ray diffraction patterns of **2-Fe** at room temperature.

**Table S4** The continuous shape measure (CSM) analyses of six-coordinate geometries for **1-Co** and **2-Fe** by SHAPE software<sup>S8</sup>

| CSM                | <b>1-Co</b> | <b>2-Fe</b> |
|--------------------|-------------|-------------|
| Hexagon            | 27.163      | 28.542      |
| Pentagonal pyramid | 13.385      | 13.207      |
| Octahedron         | 11.716      | 10.197      |
| Trigonal prism     | 3.914       | 4.240       |

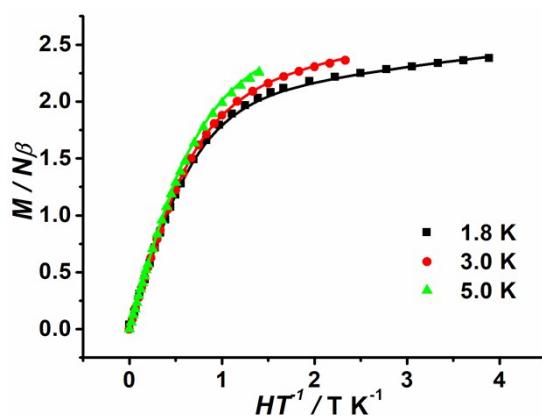

**Figure S7** The  $M$  versus  $H/T$  curves at different temperatures for **1-Co**.

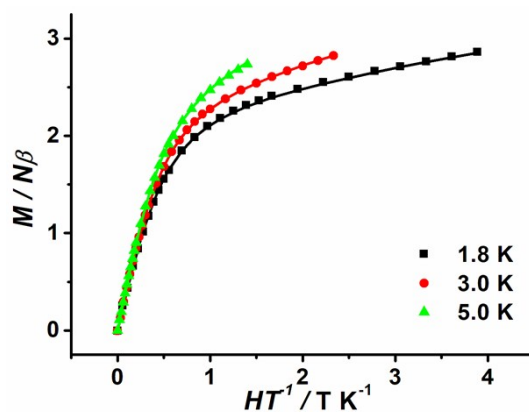

**Figure S8** The  $M$  versus  $H/T$  curves at different temperatures for **2-Fe**.

**Table S5** Zero field splitting parameters obtained fitting the experimental data using the PHI program for **1-Co** and **2-Fe**.

|                                                 | <b>1-Co</b>         | <b>2-Fe</b>         |
|-------------------------------------------------|---------------------|---------------------|
| Fitting of the $\chi_M T$ versus $T$            |                     |                     |
| $D, \text{cm}^{-1}$                             | 21.4                | -15.7               |
| $ E , \text{cm}^{-1}$                           | 1.00                | 3.27                |
| $g$                                             | 2.21                | 2.16                |
| Fitting of the $M$ versus $H$ at 1.8, 3 and 5 K |                     |                     |
| $D, \text{cm}^{-1}$                             | 13.7                | -10.6               |
| $ E , \text{cm}^{-1}$                           | 0.01                | 2.30                |
| $g$                                             | 2.25                | 2.21                |
| ab initio calculations                          |                     |                     |
| $D, \text{cm}^{-1}$                             | 17.1                | -10.0               |
| $ E , \text{cm}^{-1}$                           | -2.7                | 3.1                 |
| $g_x, g_y, g_z$                                 | 2.349, 2.282, 2.148 | 2.002, 2.106, 2.247 |

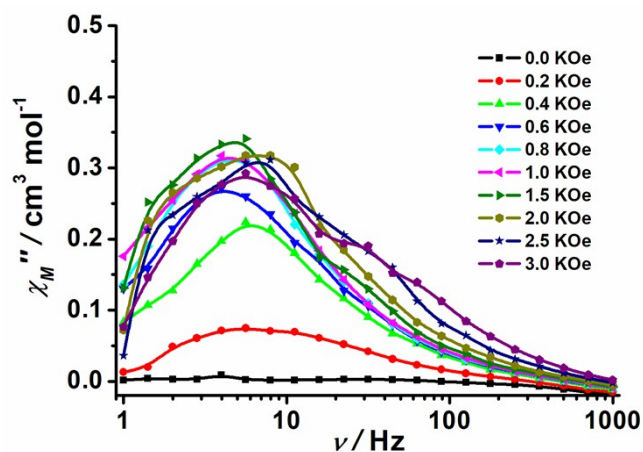

**Figure S9** Frequency dependence of the out-of-phase ( $\chi_M''$ ) ac susceptibility at 1.8 K under the applied dc fields from 0 to 3.0 KOe for **1-Co**. The solid lines are foreye guide.

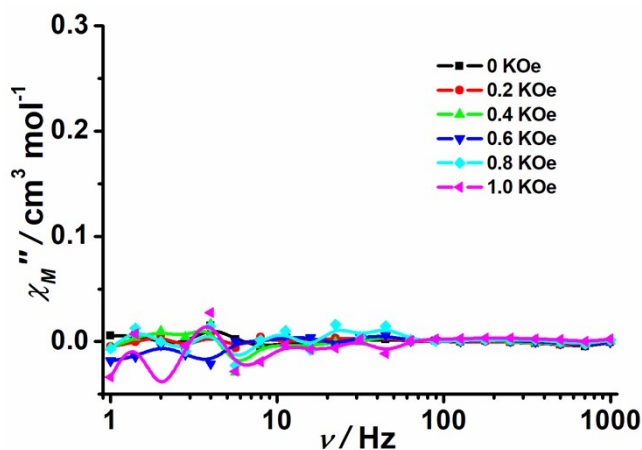

**Figure S10** Frequency dependence of the out-of-phase ( $\chi_M''$ ) ac susceptibility at 1.8 K under the applied dc fields from 0 to 1.0 KOe for **2-Fe**. The solid lines are for eye guide.

**Table S6** The parameters obtained by fitting Cole-Cole plot for **1-Co**.

| T / K | $\chi_S$ | $\chi_T$ | $\tau$  | $a$  |
|-------|----------|----------|---------|------|
| 1.8   | 0.132    | 0.866    | 0.03804 | 0.19 |
| 1.9   | 0.127    | 0.817    | 0.03304 | 0.18 |
| 2.0   | 0.123    | 0.769    | 0.02843 | 0.17 |
| 2.2   | 0.117    | 0.698    | 0.02135 | 0.15 |
| 2.4   | 0.111    | 0.635    | 0.01298 | 0.11 |
| 2.6   | 0.107    | 0.583    | 0.00607 | 0.06 |
| 2.8   | 0.104    | 0.545    | 0.00242 | 0.03 |
| 3.0   | 0.108    | 0.508    | 0.00094 | 0.01 |
| 3.4   | 0.147    | 0.455    | 0.00017 | 0.01 |

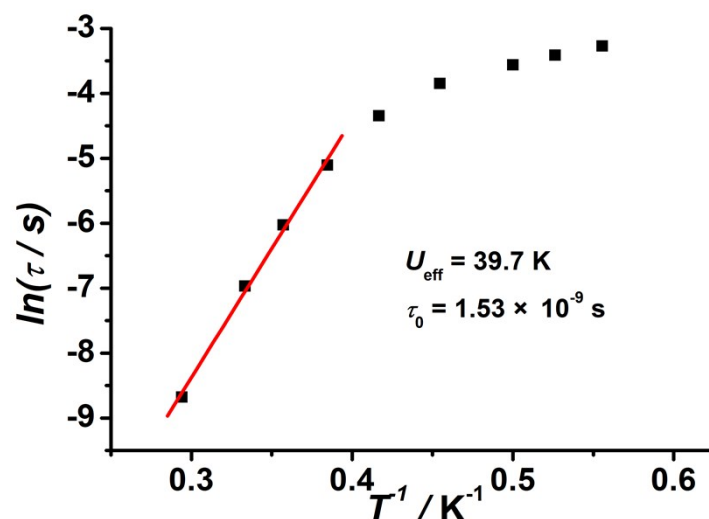

**Figure S11** Relaxation time of the magnetization  $\ln(\tau)$  vs  $T^{-1}$  plot under the 1.0 KOe applied field for **1-Co**.

**Table S7** The reported seven-coordinate Co(II)-SIMs

| Complex                                                                                                                                                                                                  | $D$ (E) / $\text{cm}^{-1}$ | $U_{\text{eff}}$ / K | Ref.      |
|----------------------------------------------------------------------------------------------------------------------------------------------------------------------------------------------------------|----------------------------|----------------------|-----------|
| [Co(BPA-TPA)](BF <sub>4</sub> ) <sub>2</sub> <sup>a</sup>                                                                                                                                                | 13.7 (0.01) <sup>d</sup>   | 39.7                 | this work |
| [Co(H <sub>2</sub> dapb)(H <sub>2</sub> O)(NO <sub>3</sub> )](NO <sub>3</sub> ) <sup>b</sup><br>(H <sub>2</sub> dapb = 2,6-diacetylpyridine bis(benzoyl hydrazine))                                      | 32.4 (0) <sup>d</sup>      | 81.2                 | S9a       |
| [CoL <sub>N5</sub> (H <sub>2</sub> O) <sub>2</sub> ]Cl <sub>2</sub> ·4H <sub>2</sub> O <sup>b</sup><br>(L <sub>N5</sub> = 2,13-dimethyl-3,6,9,12- tetraaza-1(2,6)-pyridina-cyclotridecaphane-2,12-diene) | 24.6 (0.014) <sup>d</sup>  | 29.8                 | S9a       |
| [Co(dapb)(im) <sub>2</sub> ](H <sub>2</sub> O) <sup>b</sup><br>(im=imidazole)                                                                                                                            | 24.8 (0.0016) <sup>d</sup> | 62.3                 | S9a       |
| [Co(DAPBH)(NO <sub>3</sub> )(H <sub>2</sub> O)](NO <sub>3</sub> ) <sup>b</sup><br>DAPBH=2,6-diacetylpyridinebis(2'-pyridylhydrazone)                                                                     | 30 <sup>e</sup>            | 50                   | S9b       |
| [Co(4-tert-butylpyridine) <sub>3</sub> ](NO <sub>3</sub> ) <sub>2</sub> ) <sup>b</sup>                                                                                                                   | 35.8 (0.07) <sup>e</sup>   | 25.5                 | S9c       |
| [Co(isoquinoline) <sub>3</sub> ](NO <sub>3</sub> ) <sub>2</sub> ) <sup>b</sup>                                                                                                                           | 35.7 (1.81) <sup>e</sup>   | 15.8                 | S9c       |
| [CoL](ClO <sub>4</sub> ) <sub>2</sub> <sup>b</sup><br>(L=3,12-Bis(2-methylpyridine)-3,12,18-triaza-6,9-dioxabicyclo[12.3.1]octadeca-1,14,16-triene)                                                      | 34 <sup>d</sup>            | 24.3                 | S9d       |
| [Co(tdmmb)(H <sub>2</sub> O) <sub>2</sub> ][BF <sub>4</sub> ] <sub>2</sub> ) <sup>b</sup>                                                                                                                | 35.1 (-2.7) <sup>f</sup>   | 42.2                 | S9e       |
| [Co(tdmmb)(CN) <sub>2</sub> ](H <sub>2</sub> O) <sub>2</sub> ) <sup>b</sup>                                                                                                                              | 37.7 (-3.4) <sup>f</sup>   | 48.9                 | S9e       |
| [Co(tdmmb)(NCS) <sub>2</sub> ] <sup>b</sup>                                                                                                                                                              | 34.5 (-3.6) <sup>f</sup>   | 49.2                 | S9e       |
| [Co(tdmmb)(SPh) <sub>2</sub> ] <sup>b</sup><br>(tdmmb=1,3,10,12-tetramethyl-1,2,11,12-tetraaza[[3](2,6)-pyridino[3](2,9)-1,10-phenanthroline]-2,10-diene)                                                | 39.7 (-6.8) <sup>f</sup>   | 54.7                 | S9e       |

|                                                                                                                                                                                       |                           |      |     |
|---------------------------------------------------------------------------------------------------------------------------------------------------------------------------------------|---------------------------|------|-----|
| [Co(H <sub>2</sub> daps)(MeOH) <sub>2</sub> ] <sup>b</sup>                                                                                                                            | 43.1 (3.3) <sup>d</sup>   | 33.5 | S9f |
| [Co(H <sub>4</sub> daps)(NCS)(MeOH)]·(ClO <sub>4</sub> )·(MeOH) <sup>b</sup>                                                                                                          | 41.5 (1.5) <sup>d</sup>   | 28.4 | S9f |
| [Co(H <sub>4</sub> daps)(NCS) <sub>2</sub> ]·(MeOH) <sub>2</sub> <sup>b</sup>                                                                                                         | 38.8 (2.1) <sup>d</sup>   | 23.6 | S9f |
| (Ph <sub>4</sub> P) <sub>2</sub> [Co(NO <sub>3</sub> ) <sub>4</sub> ]                                                                                                                 | 10.9 (1.56) <sup>e</sup>  | 12   | S9g |
| (MePh <sub>3</sub> P) <sub>2</sub> [Co(NO <sub>3</sub> ) <sub>4</sub> ]                                                                                                               | 12.74 (2.20) <sup>e</sup> | 20   | S9g |
| [Co(2,2'-bipyridine)(NO <sub>3</sub> ) <sub>2</sub> (CH <sub>3</sub> CN)] <sup>b</sup>                                                                                                | 32.9 (0.2) <sup>e</sup>   | 56.7 | S9h |
| [Co(1,10-phenanthroline)(NO <sub>3</sub> ) <sub>2</sub> (CH <sub>3</sub> CN)] <sup>b</sup>                                                                                            | 31.4 (0.1) <sup>e</sup>   | 46.0 | S9h |
| [Co(8-carboxymethoxy-2-carboxylicquinoline)(H <sub>2</sub> O) <sub>3</sub> ]·H <sub>2</sub> O] <sup>b</sup>                                                                           | 70.4 (8.89) <sup>d</sup>  | 5.3  | S9i |
| [Co(pypzbeyz)(NO <sub>3</sub> ) <sub>2</sub> ] <sup>b</sup><br>pypzbeyz=N-((6-(1H-pyrazol-1-yl)pyridin-2-yl)methylene)benzohydrazide                                                  | 29.9 (0.31) <sup>d</sup>  | 49.8 | S9j |
| [CoL]·H <sub>2</sub> O <sup>b</sup><br>H <sub>2</sub> L=3,12,18-triaza-6,9-dioxabicyclo[12.3.1]octadeca-1,14,16-triene-3,12-diacetic acid)                                            | 29.1 (0) <sup>d</sup>     |      | S9k |
| [Co(L)Cl <sub>2</sub> ]·2CH <sub>3</sub> OH <sup>b</sup>                                                                                                                              | 38 <sup>d</sup>           |      | S9l |
| [Co(L)Br <sub>2</sub> ] <sup>b</sup>                                                                                                                                                  | 41 <sup>d</sup>           | 4.2  | S9l |
| [Co(L)I <sub>2</sub> ] <sup>b</sup><br>L=3,12,18-triaza-6,9-dioxabicyclo[12.3.1]octadeca-1(18),14,16-triene                                                                           | 35 <sup>d</sup>           | 4.5  | S9l |
| [Co(H <sub>4</sub> L)(DMF)(H <sub>2</sub> O)](NO <sub>3</sub> ) <sub>2</sub> ·(DMF)                                                                                                   | 35.92 (1.42) <sup>d</sup> | 25   | S9m |
| [Co(H <sub>4</sub> L)(MeOH)(H <sub>2</sub> O)](NO <sub>3</sub> ) <sub>2</sub> ·(MeOH)                                                                                                 | 37.23 (0.93) <sup>d</sup> | 15   | S9m |
| [Co(H <sub>4</sub> L)(DEF)(H <sub>2</sub> O)](NO <sub>3</sub> ) <sub>2</sub><br>H <sub>4</sub> L = 2,2'-(pyridine-2,6-diylbis(ethan-1-yl-1-ylidene))bis(N-phenylhydrazinecarboxamide) | 43.76 (0.84) <sup>d</sup> | 4    | S9m |
| [Co(L-N <sub>3</sub> O <sub>2</sub> )(MeCN) <sub>2</sub> ][BPh <sub>4</sub> ] <sub>2</sub>                                                                                            | 36.9 (0.2) <sup>d</sup>   | 32   | S9n |
| [CoL <sup>5</sup> -ONHtBu]Cl <sub>2</sub> <sup>c</sup>                                                                                                                                | 9.2 (0.02) <sup>d</sup>   | 13.2 | S9o |

<sup>a</sup>capped trigonal prism; <sup>b</sup>pentagonal bipyramid; <sup>c</sup>capped octahedron; <sup>d</sup>Values obtained from the fit of dc magnetic data; <sup>e</sup>Values obtained from the electron paramagnetic resonance; <sup>f</sup>Values obtained from calculations.

**Table S8** Calculated spin-free energies (cm<sup>-1</sup>) of the lowest ten terms of complexes **1-Co** ( $S = 3/2$ ) and **2-Fe** ( $S = 2$ ) using CASSCF/RASSI-SO with MOLCAS 8.4.

|    | <b>1-Co</b>        | <b>2-Fe</b>        |
|----|--------------------|--------------------|
|    | $E/\text{cm}^{-1}$ | $E/\text{cm}^{-1}$ |
| 1  | 0.0                | 0.0                |
| 2  | 3918.1             | 591.6              |
| 3  | 4867.9             | 4625.7             |
| 4  | 5209.4             | 5233.3             |
| 5  | 7106.6             | 6492.7             |
| 6  | 8387.7             | 19202.6            |
| 7  | 10053.2            | 20522.6            |
| 8  | 21125.0            | 21174.1            |
| 9  | 21875.8            | 22046.4            |
| 10 | 25197.0            | 22560.7            |

**Table S9** Calculated weights of the five most important spin-orbit-free states for the lowest two spin-orbit states of **1-Co** and **2-Fe** using CASSCF/RASSI-SO with MOLCAS 8.4.

|             | Spin-orbit states | Energy (cm <sup>-1</sup> ) | Spin-free states, Spin, Weights |                  |                  |                  |                   |
|-------------|-------------------|----------------------------|---------------------------------|------------------|------------------|------------------|-------------------|
| <b>1-Co</b> | 1                 | 0.0                        | 1,1.5,0.97<br>64                | 2,1.5,0.01<br>40 | 3,1.5,0.00<br>64 | 4,1.5,0.00<br>14 | 17,0.5,0.0<br>005 |
|             | 2                 | 35.4                       | 1,1.5,0.98<br>37                | 4,1.5,0.00<br>56 | 3,1.5,0.00<br>51 | 2,1.5,0.00<br>44 | 19,0.5,0.0<br>003 |
| <b>2-Fe</b> | 1                 | 0.0                        | 1,2.0,0.94<br>02                | 2,2.0,0.05<br>48 | 4,2.0,0.00<br>14 | 5,2.0,0.00<br>14 | 3,2.0,0.00<br>12  |
|             |                   | 2.7                        | 1,2.0,0.93<br>64                | 2,2.0,0.05<br>95 | 5,2.0,0.00<br>15 | 3,2.0,0.00<br>11 | 4,2.0,0.00<br>07  |
|             | 2                 | 22.9                       | 1,2.0,0.97<br>58                | 2,2.0,0.01<br>84 | 4,2.0,0.00<br>33 | 3,2.0,0.00<br>08 | 5,2.0,0.00<br>08  |
|             | 3                 | 41.7                       | 1,2.0,0.97<br>37                | 2,2.0,0.02<br>32 | 4,2.0,0.00<br>11 | 5,2.0,0.00<br>10 | 3,2.0,0.00<br>03  |
|             |                   | 45.9                       | 1,2.0,0.98<br>81                | 2,2.0,0.00<br>81 | 4,2.0,0.00<br>20 | 5,2.0,0.00<br>08 | 3,2.0,0.00<br>03  |

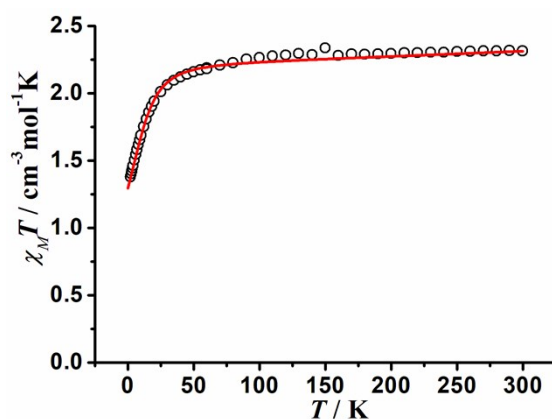

**Figure S12** Calculated (red solid line) data of magnetic susceptibilities of **1-Co**.

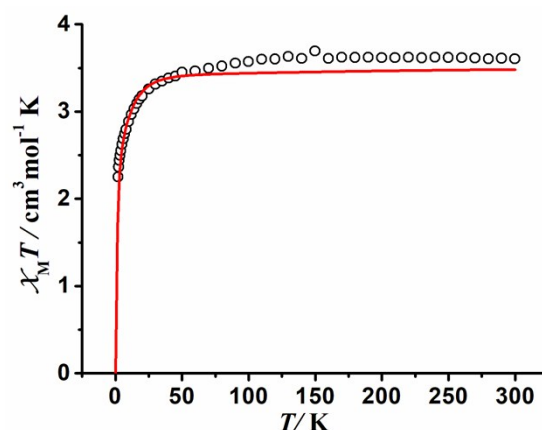

**Figure S13** Calculated (red solid line) data of magnetic susceptibilities of **2-Fe**.

## References

- S1 (a) F. A. Mautner, M. Koikawa, M. Mikuriya, E. V. Harrelson and S. S. Massoud. *Polyhedron*, 2013, **59**, 17-22; (b) D. G. Lonnon, D. C. Craig and S. B. Colbran. *Inorg. Chem. Commun.*, 2002, **5**, 958.
- S2 A. Hazell and H Toftlund. *Acta Cryst.*, 2007. **E63**, m326.
- S3 *SMART & SAINT, Software Reference Manuals, version 6.45*, Bruker Analytical X-ray Systems, Inc., Madison, WI, 2003.
- S4 G. M. Sheldrick, *SADABS – Software for Empirical Absorption Correction, version 2.05*, University of Göttingen, Göttingen, Germany, 2002.
- S5 (a) G. M. Sheldrick, *SHELXL97 – Program for Crystal Structure Refinement*, University of Göttingen, Göttingen, Germany, 1997; (b) G. M. Sheldrick, *Acta Crystallogr., Sect. C: Struct. Chem.*, 2015, **71**, 3.
- S6 F. Aquilante, J. Autschbach, R. K. Carlson, L. F. Chibotaru, M. G. Delcey, L. De Vico, I. Fdez. Galván, N. Ferré, L. M. Frutos, L. Gagliardi, M. Garavelli, A. Giussani, C. E. Hoyer, G. Li

- Manni, H. Lischka, D. Ma, P. Å. Malmqvist, T. Müller, A. Nenov, M. Olivucci, T. B. Pedersen, D. Peng, F. Plasser, B. Pritchard, M. Reiher, I. Rivalta, I. Schapiro, J. Segarra-Martí, M. Stenrup, D. G. Truhlar, L. Ungur, A. Valentini, S. Vancoillie, V. Veryazov, V. P. Vysotskiy, O. Weingart, F. Zapata and R. Lindh, *J. Comput. Chem.*, 2016, **37**, 506.
- S7 (a) L. F. Chibotaru, L. Ungur and A. Soncini, *Angew. Chem. Int. Ed.*, 2008, **47**, 4126. (b) L. Ungur, W. Van den Heuvel, L. F. Chibotaru, *New J. Chem.*, 2009, **33**, 1224. (c) L. F. Chibotaru, L. Ungur, C. Aronica, H. Elmoll, G. Pilet, D. Luneau, *J. Am. Chem. Soc.*, 2008, **130**, 12445.
- S8 M. Llunell, D. Casanova, J. Cirera, P. Alemany and S. Alvarez, *Shape program, version 2*, Universitat de Barcelona, Barcelona, Spain, 2010.
- S9 (a) X. C. Huang, C. Zhou, D. Shao and X.-Y. Wang, *Inorg. Chem.*, 2014, **53**, 12671; (b) F. Habib, I. Korobkov and M. Murugesu, *Dalton Trans.*, 2015, **44**, 6368; (c) L. Chen, S. -Y. Chen, Y. -C. Sun, Y. -M. Guo,; L. Yu, X. -T. Chen, Z. Wang, Z. W. Ouyang, Y. Song and Z. -L. Xue, *Dalton Trans.*, 2015, **44**, 11482; (d) P. Antal, B. Drahoš, R. Herchel and Z. Trávníček, *Inorg. Chem.*, 2016, **55**, 5957; (e) D. Shao, S.-L. Zhang, L. Shi, Y.-Q. Zhang and X.-Y. Wang, *Inorg. Chem.*, 2016, **55**, 10859; (f) A. K. Mondal, A. Mondal, B. Dey and S. Konar, *Inorg. Chem.*, 2018, **57**, 9999; (g) L. Chen, H.-H. Cui, S. E. Stavretis, S. C. Hunter, Y.-Q. Zhang, X.-T. Chen, Y.-C. Sun, Z. Wang, Y. Song, A. A. Podlesnyak, Z.-W. Ouyang and Z.-L. Xue\*, *Inorg. Chem.*, 2016, **55**, 12603; (h) J. Wang, H.-H. Cui, Y.-Q. Zhang, L. Chen and X.-T. Chen, *Polyhedron*, 2018, **154**, 148; (i) H. Lou, L. Yin, B. Zhang, Z.-W. Ouyang, B. Li and Z. Wang, *Inorg. Chem.*, 2018, **57**, 7757; (j) X.-C. Huang, Z.-Y. Qi, C.-L. Ji, Y.-M. Guo, S.-C. Yan, Y.-Q. Zhang, D. Shao and X.-Y. Wang, *Dalton Trans.*, 2018, **47**, 8940; (k) P. Antal, B. Drahoš, R. Herchel, and Z. Trávníček\*, *Eur. J. Inorg. Chem.*, 2018, **2018**, 4286; (l) B. Drahoš, R. Herchel and Z. Trávníček, *Inorg. Chem.*, 2017, **56**, 5076; (m) A. Mondal, A. K. Kharwar and S. Konar, *Inorg. Chem.*, 2019, **58**, 10686; (n) Y.-F. Deng, B. Yao, P.-Z. Zhan, D. Gan, Y.-Z. Zhang and K. R. Dunbar, *Dalton Trans.*, 2019, **48**, 3243; (o) C. M. Klug, T. J. Ozumerzifon, I. Bhowmick, B. N. Livesay, A. K. Rappé and M. P. Shores, *Dalton Trans.*, 2019, **48**, 9117.
